# Supplementary material
Source: PubMed Central journal article supplement (PMC9115078)
Supplement: JGS-70-1642-s001.pdf [file JGS-70-1642-s001.pdf]

**Supplemental Table S1. Background Annual Incidence Rates of Events Among Nursing Home Residents during 2020, Prior to Administration of the COVID-19 Vaccine**

|                                             | Previous SARS-CoV-2 infection |                        |                |                         |                |                      | Immunocompromised |                        |                |                        |
|---------------------------------------------|-------------------------------|------------------------|----------------|-------------------------|----------------|----------------------|-------------------|------------------------|----------------|------------------------|
|                                             | Overall<br>N=43,371           |                        | No<br>N=37,408 |                         | Yes<br>N=5,963 |                      | No<br>N=39,966    |                        | Yes<br>N=3,405 |                        |
|                                             | n                             | Per 100,000 PY         | n              | Per 100,000 PY          | n              | Per 100,000 PY       | n                 | Per 100,000 PY         | n              | Per 100,000 PY         |
| <b>Total</b>                                |                               |                        |                |                         |                |                      |                   |                        |                |                        |
| Acute Disseminated Encephalomyelitis (ADEM) | 1                             | 16.1 (2.3, 114.5)      | 1              | 20.2 (2.8, 143.2)       | 0              |                      | 1                 | 17.8 (2.5, 126.4)      | 0              |                        |
| Acute Myocardial Infarction (AMI)           | 29                            | 467.8 (325.1, 673.1)   | 29             | 585.1 (406.6, 841.9)    | 0              |                      | 28                | 498.8 (344.4, 722.4)   | 1              | 170.6 (24.0, 1210.9)   |
| Anaphylaxis                                 | 1                             | 16.1 (2.3, 114.5)      | 1              | 20.2 (2.8, 143.2)       | 0              |                      | 1                 | 17.8 (2.5, 126.4)      | 0              |                        |
| Appendicitis                                | 4                             | 64.5 (24.2, 171.8)     | 4              | 80.7 (30.3, 214.9)      | 0              |                      | 4                 | 71.2 (26.7, 189.8)     | 0              |                        |
| Bell's Palsy                                | 3                             | 48.4 (15.6, 150.0)     | 2              | 40.3 (10.1, 161.3)      | 1              | 80.4 (11.3, 571.0)   | 3                 | 53.4 (17.2, 165.6)     | 0              |                        |
| Convulsions/Seizures                        | 14                            | 225.7 (133.7, 381.2)   | 14             | 282.4 (167.2, 476.7)    | 0              |                      | 12                | 213.7 (121.4, 376.3)   | 2              | 341.3 (85.3, 1364.5)   |
| Disseminated Intravascular Coagulation      | 1                             | 16.1 (2.3, 114.5)      | 1              | 20.2 (2.8, 143.2)       | 0              |                      | 1                 | 17.8 (2.5, 126.4)      | 0              |                        |
| Guillain-Barré syndrome (GBS)               | 2                             | 32.2 (8.1, 128.9)      | 2              | 40.3 (10.1, 161.3)      | 0              |                      | 2                 | 35.6 (8.9, 142.4)      | 0              |                        |
| Myocarditis/pericarditis                    | 1                             | 16.1 (2.3, 114.5)      | 1              | 20.2 (2.8, 143.2)       | 0              |                      | 1                 | 17.8 (2.5, 126.4)      | 0              |                        |
| Stroke, hemorrhagic                         | 11                            | 175.3 (97.1, 316.5)    | 11             | 221.9 (122.9, 400.6)    | 0              |                      | 9                 | 160.3 (83.4, 308.0)    | 2              | 341.2 (85.3, 1364.4)   |
| Stroke, ischemic                            | 66                            | 1068.4 (840.9, 1357.4) | 64             | 1291.9 (1011.2, 1650.5) | 2              | 160.9 (40.2, 643.4)  | 63                | 1122.8 (877.1, 1437.3) | 3              | 512.0 (165.1, 1587.6)  |
| Venous thromboembolism (VTE)                | 48                            | 765.3 (576.8, 1015.6)  | 44             | 888.0 (660.8, 1193.3)   | 4              | 321.9 (120.8, 857.8) | 42                | 748.4 (553.1, 1012.7)  | 6              | 1024.9 (460.5, 2281.4) |
| Pulmonary Embolism (PE)                     | 25                            | 398.4 (269.2, 589.6)   | 25             | 504.3 (340.7, 746.4)    | 0              |                      | 23                | 409.7 (272.2, 616.5)   | 2              | 230.7 (57.7, 922.3)    |
| Death                                       | 2654                          | 42790 (41192, 44449)   | 2314           | 46662 (44799, 48603)    | 340            | 27345 (24598, 30412) | 2406              | 42841 (41163, 44588)   | 248            | 42296 (37346, 47901)   |

PY: Person-Year

Note: Residents with a positive COVID-19 test within 20 days of study start date or on monoclonal antibodies within 90 days of study start date were excluded to prevent detection of adverse events attributable to viral infection or treatment.
